# Supplementary material for: Ultrasound-guided glenohumeral joint injections for shoulder pain in ALS: A case series
Source: Frontiers journal article supplement (doi:10.3389/fneur.2022.1067418), 2023-02-02
Supplement: Data_Sheet_1.pdf [file Data_Sheet_1.pdf]

## *Supplementary Material*

### 1 Supplementary Tables

**Supplementary Table 1. Case 1.**

|                                                                         | Pre-injection* | 1st follow-up post injection | 2nd follow-up post injection | 3rd follow-up post injection |
|-------------------------------------------------------------------------|----------------|------------------------------|------------------------------|------------------------------|
| Time from Baseline (days)                                               | -19            | 7                            | 28                           | 74                           |
| Pain 0-10 ( R/L)                                                        |                |                              |                              |                              |
| Average throughout day                                                  | 7/7            | 4/7                          | 5/7                          | 0/0                          |
| Maximum throughout day                                                  | 9/9            | 8/7                          | 8/8                          | 5/5                          |
| Lying down at rest                                                      | 3/3            | 0/0                          | 0/0                          | 0/0                          |
| Sitting at rest                                                         | 3/3            | 0/0                          | 0/0                          | 0/0                          |
| Eating                                                                  | 8/8            | 4/0                          | 4/0                          | 0/0                          |
| Getting dressed                                                         | 10/10          | 8/7                          | 1/1                          | 5/5                          |
| During transfers                                                        | 10/10          | 8/7                          | 8/7                          | 0/0                          |
| Riding in car                                                           | 8/8            | 0/0                          | 0/0                          | 0/0                          |
| Walking                                                                 | NA             | NA                           | NA                           | NA                           |
| ALSFRS-R fine and gross motor questions                                 |                |                              |                              |                              |
| 4. Handwriting                                                          | 2              | 1                            | 1                            | 0                            |
| 5. Cutting and handling utensils                                        | 1              | 0                            | 0                            | 1                            |
| 6. Dressing and hygiene                                                 | 0              | 1                            | 1                            | 1                            |
| 7. Turning in bed and adjusting bed clothes                             | 1              | 1                            | 1                            | 1                            |
| 8. Walking                                                              | 1              | 1                            | 1                            | 1                            |
| 9. Climbing stairs                                                      | 0              | 0                            | 0                            | 0                            |
| Total (0-24)                                                            | 5              | 4                            | 4                            | 4                            |
| My shoulder pain keeps me from getting enough sleep at night.           | Often          | Never                        | Never                        | Never                        |
| My shoulder pain limits my ability to complete daily hygiene.           | Always         | Often                        | Sometimes                    | Rarely                       |
| My shoulder pain limits my ability to get dressed each day.             | Always         | Often                        | Sometimes                    | Always                       |
| My shoulder pain limits me from leaving the house for other activities. | Always         | Never                        | Never                        | Never                        |
| My shoulder pain has a negative impact on my quality of life.           | Always         | Often                        | Often                        | Always                       |

\*Did not complete survey on day of baseline, but patient reported right shoulder pain was 10/10 at its worst on day of injections.

**Supplementary Table 2. Case 2.**

|                                                                         | Pre-injection* | 1st follow-up post injection | 2nd follow-up post injection |
|-------------------------------------------------------------------------|----------------|------------------------------|------------------------------|
| Time (days)                                                             | -22            | 7                            | 21                           |
| Pain 0-10 ( R/L)                                                        |                |                              |                              |
| Average throughout day                                                  | 7/0            | 2/0                          | 2/0                          |
| Maximum throughout day                                                  | 9/0            | 4/0                          | 5/0                          |
| Lying down at rest                                                      | 3/0            | 1/0                          | 2/0                          |
| Sitting at rest                                                         | 3/0            | 1/0                          | 2/0                          |
| Eating                                                                  | 3/0            | 2/0                          | 2/0                          |
| Getting dressed                                                         | 6/0            | 3/0                          | 4/0                          |
| During transfers                                                        | 7/0            | 3/0                          | 4/0                          |
| Riding in car                                                           | 4/0            | 2/0                          | 2/0                          |
| Walking                                                                 | 5/0            | 2/0                          | 2/0                          |
| ALSFRS-R fine and gross motor questions                                 |                |                              |                              |
| 4. Handwriting                                                          | 0              | 0                            | 0                            |
| 5. Cutting and handling utensils                                        | 2              | 2                            | 2                            |
| 6. Dressing and hygiene                                                 | 2              | 2                            | 2                            |
| 7. Turning in bed and adjusting bed clothes                             | 3              | 3                            | 3                            |
| 8. Walking                                                              | 2              | 2                            | 2                            |
| 9. Climbing stairs                                                      | 1              | 1                            | 1                            |
| Total (0-24)                                                            | 10             | 10                           | 10                           |
| My shoulder pain keeps me from getting enough sleep at night.           | Sometimes      | Rarely                       | Sometimes                    |
| My shoulder pain limits my ability to complete daily hygiene.           | Often          | Rarely                       | Sometimes                    |
| My shoulder pain limits my ability to get dressed each day.             | Often          | Sometimes                    | Sometimes                    |
| My shoulder pain limits me from leaving the house for other activities. | Rarely         | Rarely                       | Sometimes                    |
| My shoulder pain has a negative impact on my quality of life.           | Often          | Sometimes                    | Sometimes                    |

\*Did not complete survey on day of baseline, but patient reported pain 2/10 at baseline visit with a maximum pain of 5/10 in the right shoulder.

**Supplementary Table 3. Case 3.**

|                                                                         | Pre-injection* | 1st follow-up post injection | 2nd follow-up post injection | 3rd follow-up post injection |
|-------------------------------------------------------------------------|----------------|------------------------------|------------------------------|------------------------------|
| Time (days)                                                             | -3             | 7                            | 25                           | 87                           |
| Pain 0-10 ( R/L)                                                        |                |                              |                              |                              |
| Average throughout day                                                  | 3/4            | 0/0                          | 2/3                          | 0/0                          |
| Maximum throughout day                                                  | 4/5            | 5/5                          | 2/3                          | 10/10                        |
| Lying down at rest                                                      | 3/5            | 0/0                          | 0/0                          | 0/0                          |
| Sitting at rest                                                         | 2/4            | 0/0                          | 0/0                          | 0/0                          |
| Eating                                                                  | 3/5            | 5/5                          | 0/0                          | 1/1                          |
| Getting dressed                                                         | 7/8            | 5/5                          | 2/3                          | 4/4                          |
| During transfers                                                        | 5/7            | 0/0                          | 2/3                          | 0/0                          |
| Riding in car                                                           | 3/4            | 0/0                          | 0/0                          | 3/3                          |
| Walking                                                                 | 2/4            | 0/0                          | 0/0                          | 3/3                          |
| ALSFRS-R fine and gross motor questions                                 |                |                              |                              |                              |
| 4. Handwriting                                                          | 3              | 3                            | 3                            | 1                            |
| 5. Cutting and handling utensils                                        | 1              | 1                            | 1                            | 1                            |
| 6. Dressing and hygiene                                                 | 1              | 0                            | 1                            | 1                            |
| 7. Turning in bed and adjusting bed clothes                             | 2              | 1                            | 1                            | 1                            |
| 8. Walking                                                              | 3              | 3                            | 3                            | 3                            |
| 9. Climbing stairs                                                      | 1              | 0                            | 1                            | 1                            |
| Total (0-24)                                                            | 11             | 8                            | 10                           | 8                            |
| My shoulder pain keeps me from getting enough sleep at night.           | Rarely         | Rarely                       | Never                        | Never                        |
| My shoulder pain limits my ability to complete daily hygiene.           | Always         | Always                       | Never                        | Always                       |
| My shoulder pain limits my ability to get dressed each day.             | Always         | Always                       | Never                        | Always                       |
| My shoulder pain limits me from leaving the house for other activities. | Often          | Always                       | Never                        | Rarely                       |
| My shoulder pain has a negative impact on my quality of life.           | Always         | Sometimes                    | Never                        | Always                       |

\*Did not complete survey on day of baseline visit as pre-injection outcomes were collected just three days prior. He did report that his pain levels were unchanged.

**Supplementary Table 4. Case 4.**

|                                                                         | Pre-injection* | Baseline<br>Day of<br>Injections | 1st follow-<br>up post<br>injection | 2nd follow-<br>up post<br>injection | 3rd follow-<br>up post<br>injection |
|-------------------------------------------------------------------------|----------------|----------------------------------|-------------------------------------|-------------------------------------|-------------------------------------|
| Time (days)                                                             | -18            |                                  | 10                                  | 31                                  | 87                                  |
| Pain 0-10 ( R/L)                                                        |                |                                  |                                     |                                     |                                     |
| Average throughout day                                                  | 6/5            | 2/5                              | 1/2                                 | 4/4                                 | 6/6                                 |
| Maximum throughout day                                                  | 8/8            | 5/5                              | 4/4                                 | 8/8                                 | 8/6                                 |
| Lying down at rest                                                      | NA/5           | 0/0                              | 0/0                                 | 0/0                                 | 0/0                                 |
| Sitting at rest                                                         | 5/5            | 2/2                              | 0/0                                 | 0/0                                 | 0/0                                 |
| Eating                                                                  | NA/5           | 0/0                              | 0/0                                 | 0/0                                 | 0/0                                 |
| Getting dressed                                                         | 5/8            | 3/3                              | 1/2                                 | 2/2                                 | 4/2                                 |
| During transfers                                                        | 5/8            | 0/0                              | 0/0                                 | 0/0                                 | 0/0                                 |
| Riding in car                                                           | NA/5           | 2/2                              | 0/0                                 | 0/0                                 | 0/0                                 |
| Walking                                                                 | 2/5            | 5/5                              | 3/5                                 | 8/8                                 | 0/0                                 |
| ALSFRS-R fine and gross motor questions                                 |                |                                  |                                     |                                     |                                     |
| 4. Handwriting                                                          | 4              |                                  | 4                                   | 4                                   | 4                                   |
| 5. Cutting and handling utensils                                        | 4              |                                  | 4                                   | 4                                   | 4                                   |
| 6. Dressing and hygiene                                                 | 2              |                                  | 2                                   | 2                                   | 2                                   |
| 7. Turning in bed and adjusting bed clothes                             | 3              |                                  | 3                                   | 3                                   | 3                                   |
| 8. Walking                                                              | 2              |                                  | 2                                   | 2                                   | 2                                   |
| 9. Climbing stairs                                                      | 1              |                                  | 1                                   | 1                                   | 1                                   |
| Total (0-24)                                                            | 16             |                                  | 16                                  | 16                                  | 16                                  |
| My shoulder pain keeps me from getting enough sleep at night.           | Always         | Never                            | Never                               | Never                               | Never                               |
| My shoulder pain limits my ability to complete daily hygiene.           | Always         | Always                           | Never                               | Never                               | Never                               |
| My shoulder pain limits my ability to get dressed each day.             | Always         | Sometimes                        | Rarely                              | Rarely                              | Sometimes                           |
| My shoulder pain limits me from leaving the house for other activities. | Sometimes      | Often                            | Rarely                              | Rarely                              | Rarely                              |
| My shoulder pain has a negative impact on my quality of life.           | Always         | Sometimes                        | Never                               | Never                               | Never                               |

\*Screening and Baseline were completed on different days and patient completed survey on pain and function at both visits. ALSFRS-R was not repeated at the baseline visit.

**Supplementary Table 5. Case 5.**

|                                                                         | Pre-injection* | 1st follow-up post injection** | 2nd follow-up post injection | 3rd follow-up post injection |
|-------------------------------------------------------------------------|----------------|--------------------------------|------------------------------|------------------------------|
| Time (days)                                                             | 0              | 11                             | 28                           | 87                           |
| Pain 0-10 ( R/L)                                                        |                |                                |                              |                              |
| Average throughout day                                                  | 1/7            | 0/0                            | 0/0                          | 0/0                          |
| Maximum throughout day                                                  | 1/8            | 0/0                            | 0/0                          | 0/0                          |
| Lying down at rest                                                      | 0/7            | 0/0                            | 0/0                          | 0/0                          |
| Sitting at rest                                                         | 0/0            | 0/0                            | 0/0                          | 0/0                          |
| Eating                                                                  | 0/0            | 0/0                            | 0/0                          | 0/0                          |
| Getting dressed                                                         | 0/2            | 0/0                            | 0/0                          | 0/0                          |
| During transfers                                                        | 0/0            | 0/0                            | 0/0                          | 0/0                          |
| Riding in car                                                           | 0/0            | 0/0                            | 0/0                          | 0/0                          |
| Walking                                                                 | 0/0            | 0/0                            | 0/0                          | 0/0                          |
| ALSFRS-R fine and gross motor questions                                 |                |                                |                              |                              |
| 4. Handwriting                                                          | 0              | 0                              | 0                            | 0                            |
| 5. Cutting and handling utensils                                        | 0              | 0                              | 0                            | 0                            |
| 6. Dressing and hygiene                                                 | 0              | 0                              | 0                            | 0                            |
| 7. Turning in bed and adjusting bed clothes                             | 2              | 2                              | 2                            | 0                            |
| 8. Walking                                                              | 3              | 3                              | 2                            | 1                            |
| 9. Climbing stairs                                                      | 0              | 0                              | 0                            | 0                            |
| Total (0-24)                                                            | 5              | 5                              | 4                            | 1                            |
| My shoulder pain keeps me from getting enough sleep at night.           | Always         | Never                          | Never                        | Never                        |
| My shoulder pain limits my ability to complete daily hygiene.           | Never          | Never                          | Never                        | Never                        |
| My shoulder pain limits my ability to get dressed each day.             | Always         | Never                          | Never                        | Never                        |
| My shoulder pain limits me from leaving the house for other activities. | Never          | Never                          | Never                        | Never                        |
| My shoulder pain has a negative impact on my quality of life.           | Never          | Never                          | Never                        | Never                        |

\*Patient completed pre-injection outcomes on same day as injection (baseline).

\*\*Patient Reported No Pain starting 1st follow-up post injection.

## 2 Supplementary Data - Survey

### Shoulder Survey

A. Do you have pain in your **RIGHT** shoulder? Yes No

*If no, please skip to section B.*

What is your average pain level in your **right** shoulder throughout the day?

0 1 2 3 4 5 6 7 8 9 10

What is the maximum pain level you experience in your **right** shoulder throughout the day?

0 1 2 3 4 5 6 7 8 9 10

On a scale of 0-10 with 0 being no pain and 10 being the worst pain imaginable, please rate your **average RIGHT** shoulder pain during the following activities:

|                    |     |   |   |   |   |   |   |   |   |   |   |    |
|--------------------|-----|---|---|---|---|---|---|---|---|---|---|----|
| Lying down at rest | N/A | 0 | 1 | 2 | 3 | 4 | 5 | 6 | 7 | 8 | 9 | 10 |
| Sitting at rest    | N/A | 0 | 1 | 2 | 3 | 4 | 5 | 6 | 7 | 8 | 9 | 10 |
| Eating             | N/A | 0 | 1 | 2 | 3 | 4 | 5 | 6 | 7 | 8 | 9 | 10 |
| Getting dressed    | N/A | 0 | 1 | 2 | 3 | 4 | 5 | 6 | 7 | 8 | 9 | 10 |
| During transfers   | N/A | 0 | 1 | 2 | 3 | 4 | 5 | 6 | 7 | 8 | 9 | 10 |
| Riding in a car    | N/A | 0 | 1 | 2 | 3 | 4 | 5 | 6 | 7 | 8 | 9 | 10 |
| Walking            | N/A | 0 | 1 | 2 | 3 | 4 | 5 | 6 | 7 | 8 | 9 | 10 |

B. Do you have pain in your **LEFT** shoulder? Yes No

*If no, please skip to section C.*

What is your average pain level in your **left** shoulder throughout the day?

0 1 2 3 4 5 6 7 8 9 10

What is the maximum pain level you experience in your **left** shoulder throughout the day?

0 1 2 3 4 5 6 7 8 9 10

On a scale of 0-10 with 0 being no pain and 10 being the worst pain imaginable, please rate your **average LEFT** shoulder pain during the following activities:

|                    |     |   |   |   |   |   |   |   |   |   |   |    |
|--------------------|-----|---|---|---|---|---|---|---|---|---|---|----|
| Lying down at rest | N/A | 0 | 1 | 2 | 3 | 4 | 5 | 6 | 7 | 8 | 9 | 10 |
| Sitting at rest    | N/A | 0 | 1 | 2 | 3 | 4 | 5 | 6 | 7 | 8 | 9 | 10 |
| Eating             | N/A | 0 | 1 | 2 | 3 | 4 | 5 | 6 | 7 | 8 | 9 | 10 |
| Getting dressed    | N/A | 0 | 1 | 2 | 3 | 4 | 5 | 6 | 7 | 8 | 9 | 10 |
| During transfers   | N/A | 0 | 1 | 2 | 3 | 4 | 5 | 6 | 7 | 8 | 9 | 10 |
| Riding in a car    | N/A | 0 | 1 | 2 | 3 | 4 | 5 | 6 | 7 | 8 | 9 | 10 |
| Walking            | N/A | 0 | 1 | 2 | 3 | 4 | 5 | 6 | 7 | 8 | 9 | 10 |

C. Please rate the following:

|                                                               |       |        |           |       |        |
|---------------------------------------------------------------|-------|--------|-----------|-------|--------|
| My shoulder pain keeps me from getting enough sleep at night. | Never | Rarely | Sometimes | Often | Always |
| My shoulder pain limits my ability to complete daily hygiene. | Never | Rarely | Sometimes | Often | Always |
| My shoulder pain limits my ability to get dressed each day.   | Never | Rarely | Sometimes | Often | Always |

|                                                                         |       |        |           |       |        |
|-------------------------------------------------------------------------|-------|--------|-----------|-------|--------|
| My shoulder pain limits me from leaving the house for other activities. | Never | Rarely | Sometimes | Often | Always |
| My shoulder pain has a negative impact on my quality of life.           | Never | Rarely | Sometimes | Often | Always |

D. Please answer the following questions:

Do you do stretches or range of motion exercises for your shoulders?      Yes      No

If yes, how often?

- a. Never
- b. Occasionally (once a month to once a week)
- c. Often (2-5 days a week)
- d. Daily

If no, what are the barriers to doing stretches or range of motion exercises? (*check all that apply*)

- ☐ The exercises cause pain
  - ☐ I don't have time
  - ☐ I don't know how to do the exercises
  - ☐ I cannot do the exercises by myself and I don't have people to help me
  - ☐ I am not interested in exercising
  - ☐ Other
- 

Did you receive information about the importance of shoulder stretching or range of motion exercises for people with ALS?      Yes      No

If yes, where? (*check all that apply*)

- ☐ ALS Clinic or other healthcare setting (doctor, nurse, PT)
  - ☐ Online
  - ☐ Other
-
